# Supplementary material for: The underappreciated role of nonvolatile cations on aerosol ammonium-sulfate molar ratios
Source: Copernicus journal article supplement (doi:10.5194/acp-2017-737), 2017-08-16
Supplement: Supplementary file [file acp-2017-737-AC2-supplement.pdf]

## Responses to Referee #2

We thank the referee for the thoughtful and constructive comments. Before a point-by-point response to the issues raised, we would like to articulate the main points of our work:

- Including NVCs in the thermodynamic model largely resolves the molar ratio discrepancy, based on our data set, which is representative of the southeast. Only small amounts of NVC are often required, therefore the practice of omitting NVCs from fine mode calculations (which may seem unavoidable for many datasets) induces important biases in molar ratios, which have to be considered in any relevant interpretations (especially on the role of organics).
- The bias in  $R$  (ISORROPIA predicted  $R$  with  $\text{Na}^+$  minus ISORROPIA predicted  $R$  without  $\text{Na}^+$ , where  $R = \text{NH}_4^+/\text{SO}_4^{2-}$ , mole/mole) is highly correlated with measured  $\text{Na}^+$  ( $r^2 = 0.93$ ), but not correlated with OA mass or OA mass fraction. Furthermore, the difference in observed  $R$  from a ratio of 2 ( $R$  observed minus 2) is correlated with NVCs and not correlated with OA mass or OA mass fraction. Both results provide strong evidence for NVCs, and not OA, as the underlying driver of the molar ratio discrepancy.

We have addressed the comments (numbered, below), with referee comments in quotes and italics, and our responses in plain text.

1. *“The largest issue is that a fully internal mixture (with all species present in each particle at their bulk atmospheric concentrations) is assumed, meaning that any  $\text{Na}^+$  is assumed to be present in the same particles that have ammonium, sulfate, and nitrate. Literature from co-located sampling over the same time period shows that in fact most  $\text{Na}^+$  present during SOAS was not mixed with SOA, but was present in sea spray aerosol or other mechanically generated particles, such as mineral dust (Allen et al., 2015; Bondy et al., 2017). Thus  $\text{Na}^+$  cannot explain the values of  $R$  that the manuscript is using  $\text{Na}^+$  to explain. The concept of “inferred - sodium” is particularly worrisome, as it is not necessarily supported even by bulk measurements and  $\text{Na}^+$ . Another serious concern is that values of  $\text{Na}^+$  are reported that are below LOD, which is not appropriate and that the measured  $\text{Na}^+$  is below the LOD when “inferred  $\text{Na}^+$ ” is  $>4$  times higher than a value which is unreliable. Studies going back almost 20 years in Atlanta and the southeast U.S. have shown that NVCs are not present in SOA, particularly with single particle mass spectrometry, which is extremely sensitive to  $\text{Na}^+$  and  $\text{K}^+$ .”*

Mixing state of NVCs with ammonium, sulfate, and nitrate is a valid concern that we had not addressed in the original study. The assertion that there is *absolutely no mixing* of  $\text{Na}^+$  with sulfate is incorrect.  $\text{Na}^+$ , which is largely from sea salt (as noted by the reviewer), will contain some fraction of sulfate since it is well known that there is sulfate in sea water (~25%  $\text{SO}_4^{2-}/\text{Na}^+$  mass ratio) (DOE, 1994), apart from any secondary non-sea-salt sulfate or subsequent effects from aerosol aging processes. Nevertheless, we have now considered the impact of incomplete mixing of the non-volatile

inorganic species (sulfate, sodium and other NVC) on  $R$  and pH in a separate section in the main text. The analysis shows that with a small fraction of sulfate internally mixed with  $\text{Na}^+$ -rich particles gives acidity and partitioning levels consistent with that of complete internal mixing. The issue of mixing state of NVCs with SOA does not affect our conclusions as well, especially given that the molar ratio discrepancies (one of the main points in our paper) can be explained by inorganic species without any consideration of organic effects. Therefore, effects from incomplete mixing of particles do not alter our conclusions obtained in the original analysis.

The use of data below LOD is justified as the LOD is simply an estimate (i.e. three times of field blanks standard deviation). We note throughout the text when we are using data that is below the LOD. Below we show that the use of inferred  $\text{Na}^+$  is reasonable as an upper limit of NVCs through comparisons with measurements by other instruments at the SOAS study. Here we show that when measured  $\text{NVC} > \text{measurement LOD}$  (i.e., reliable NVC concentrations, admittedly a small fraction of the study period) there is good agreement between measured and ISORROPIA-predicted  $R$  (updated Fig. 1f and Fig. 3, and associated text; no difference at a significance level of  $\alpha = 0.05$ ). Issues arise (which is not surprising) when the NVC concentrations are below or near LOD and they have to be estimated. Most defensible conclusions can be made for periods with the most reliable data (NVCs above LODs). Assessments and critiques that focus solely on only periods of the least reliable data sets (NVCs below LODs) are weak. However, even periods with NVCs below LODs, often provide consistent results. For example:

- For SOAS, when measured  $\text{Na}^+$  was below LOD ( $0.07 \mu\text{g m}^{-3}$ ), a  $\text{Na}^+$  of  $0.1\text{-}0.3 \mu\text{g m}^{-3}$  was needed to bring measured and predicted  $R$  into agreement, which is near the detection limit and so difficult to measure. Despite this, the trends are the same and the predicted  $R$  is generally smaller than the observed, and so including the estimated NVCs in this case overcompensates.
- For WINTER data, inferred NVC results in agreement in  $R$  prediction with the observation, but inferred  $\text{Na}^+$  is smaller than observed  $\text{PM}_{10} \text{Na}^+$ ,  $0.15$  vs.  $0.23 \mu\text{g m}^{-3}$ , stated in the caption of Figure 4. Again, the results are uncertain since measurements of NVC were not measured online in that study.

The reviewer criticizes the inferred  $\text{Na}^+$  from ion charge balance to be worrisome and much higher than measured  $\text{Na}^+$ . The inferred  $\text{Na}^+$  represents an upper limit of NVCs, including  $\text{K}^+$ ,  $\text{Mg}^{2+}$ , and  $\text{Ca}^{2+}$  (if soluble), that could be present in the aqueous aerosols based on charge neutrality of the solution. Therefore, it is supposed to be higher than a single measurement of NVC, such as  $\text{Na}^+$ . We have results from the WINTER study showing the inferred  $\text{Na}^+$  is comparable to the offline measurement. Also, in Figure I (b), we show a comparison between inferred  $\text{Na}^+$  from PILS-IC data and MARGA data and measured  $\text{Na}^+$ -equivalent NVCs ( $\text{K}^+$ ,  $\text{Mg}^{2+}$ , and  $\text{Ca}^{2+}$  are represented by  $\text{Na}^+$ ) from MARGA for the SOAS study (Allen et al., 2015). Before June 18, the three  $\text{Na}^+$  levels are similar, indicating the inferred  $\text{Na}^+$  level is

reasonable. After June 18, the two inferred  $\text{Na}^+$  levels are higher than MARGA total measured NVCs, but the differences are within uncertainties (propagated from PILS-IC ammonium, sulfate, nitrate, and chloride measurements).

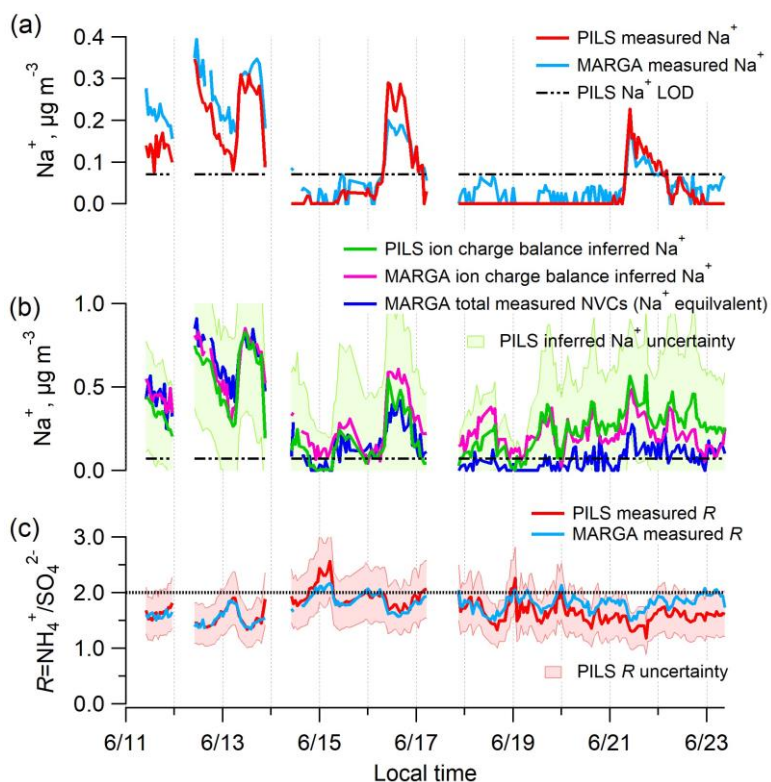

**Figure I.** (a) Comparison of  $\text{PM}_{2.5}$  PILS and MARGA  $\text{Na}^+$ . (b) Comparison of inferred  $\text{Na}^+$  (from ion charge balance;  $\text{Na}^+ = 2\text{SO}_4^{2-} + \text{NO}_3^- + \text{Cl}^- - \text{NH}_4^+$ ,  $\text{nmol m}^{-3}$ ) by PILS and MARGA to total measured NVCs by MARGA (represented by  $\text{Na}^+$ ), and (c) comparison of PILS and MARGA ammonium-sulfate molar ratios ( $R$ ). Data are from the SOAS study.

2. “Page 4 Lines 33 - 36 and Page 5 lines 1 - 7: Of the three different  $\text{Na}^+$  levels tested, option 1 infers that any lack of charge balance can be attributed to  $\text{Na}^+$ . On line 35 - 36, the authors then note that inferring the amount of  $\text{Na}^+$  leads to a value more than 4 times higher than the measured value. There are a number of other possibilities that could explain these strongly different results and inferring shouldn’t work as there is almost no  $\text{Na}^+$  mixed with SOA particles. This is in fact supported by the fact that the reported values for  $\text{Na}^+$  are below the limit of detection of the measurement (0.06 value when LOD is 0.07)”

We have addressed this question above. The inferred  $\text{Na}^+$  is at reasonable levels in both SOAS and WINTER studies.

3. *“Page 5 Lines 2 - 3: The authors choose to use values for Na<sup>+</sup> below LOD for the rest of the study, even though they are below LOD. This is a substantial issue and values below LOD should not published or used as the basis for the main analysis over the remainder of the paper.”*

We believe there is a slight misinterpretation of results here. First of all, our PILS-IC measurement of Na<sup>+</sup> is believed to be accurate; it is in agreement with MARGA data, as showed in Figure I (a) above (this figure has also been added to the supplemental material as Fig. S2). The periods of below Na<sup>+</sup> LOD are intended to show that when close to zero Na<sup>+</sup> and is included in the thermodynamic model, a near 2 molar ratio ( $R$ ) is predicted. We focus on the periods, where Na<sup>+</sup> is above the LOD for added confidence. For these periods, as noted before, we find good agreement between predicted and measured  $R$  (no statistical difference at  $\alpha = 0.05$ ). The roles of NVCs and organics on molar ratio are based mainly based on observed data above LOD (Fig. 4). We have added more details on the comparisons of measured and predicted  $R$  for various Na<sup>+</sup> levels (see added Fig. 3), and included a comparison with MARGA data in the supplemental material (Fig. S2 and S3).

4. *“Page 5 Lines 9 - 15: Most Na<sup>+</sup> at SOAS is present from sea spray aerosol (SSA), which has been shown in multiple papers (Allen et al., 2015; Bondy et al., 2017). This authors’ observation that Cl<sup>-</sup> and NO<sub>3</sub><sup>-</sup> have high R<sub>2</sub> values with Na<sup>+</sup> and agrees with the papers showing that Na<sup>+</sup> is from other sources than SOA, which further highlights that Na<sup>+</sup> is not present in SOA particles. It is also worth noting that June 10 - 13 at SOAS (during the period Guo et al focus on) there was a large contribution of sea spray aerosol at Centreville (Bondy et al., 2017). This includes the submicron where 20 - 40% of particles between 200 - 1000 nm were not SOA - dominant particles and are likely where nearly all of the Na<sup>+</sup> was located.”*

We have addressed this question above.

5. *“Page 6 Lines 7 - 10: The paper here discusses June 11 - 13, which was a high sea salt time period, leading to a more externally mixed aerosol and the Na<sup>+</sup> was not present in SOA particles.”*

We have addressed this question above. Also note that a higher concentration of sea salt doesn’t necessarily indicate a more externally mixed aerosol; the latter depends on the age of the aerosol and the processes that act upon it from emission.

6. *“Page 6 Last Paragraph: While Na<sup>+</sup> somewhat tracks with delta R, since Na<sup>+</sup> is not in the same particles the paragraph comes to close to attributing causation to a correlation. The wording in this section needs to be weakened. Also, the presumption that organic mass should be correlated with organic film thickness is overstated. Composition, viscosity, etc. all matter when a film might form and OA mass fractions would not provide meaningful estimates of this.”*

We don't agree. Our results from assuming an external mixture are consistent with bulk analysis (internal mixture), see added section on internal vs. external mixture. It is true that we have no data on organic film thickness, but if the organic film is sufficient to impede  $\text{NH}_3$  uptake it *has* to comprise a reasonable fraction of the overall OA (a timescale analysis easily shows this), and concurrently impede equilibration of water and nitrate with the gas phase. We show that neither OA mass or mass fraction is related to observed bias in *R*. If the argument is that an organic film has a widespread effect throughout the southeast, it can't be argued that it is some unique property of the OA (i.e. unique composition, unique viscosity, selectivity with respect to  $\text{NH}_3$ , etc.) unless if a specific mechanism can be proposed to support it.

7. *“Page 7 Lines 10 - 13: The authors mention higher  $\text{Na}^+$  near coastlines, which is again likely from sea spray and would not be mixed with SOA in the same particles in all likelihood (unfortunately there is not single particle data to provide information on mixing state from that study to my knowledge).”*

We have answered this question above.

8. *“The clarity of the writing, particularly in the introduction, could be improved as there are numerous long sentences and confusing wording that could be improved. Also there numerous missing words, incorrect plural versus singular, and conjugation throughout the manuscript, which needs to be cleaned up”*

We thank the reviewer for pointing this out. The paper has been edited for clarity.

9. *“Page 2 Lines 7 - 11: “Despite its importance, the inability to directly measure fine mode particle pH (e.g. Rindelaub et al. (2016) presents an indirect method that infers particle  $\text{H}^+$  activity for sizes above 10  $\mu\text{m}$  and requires activity coefficient predicted by a thermodynamic modeling. This method reports the pH for a  $\text{HSO}_4^-/\text{SO}_4^{2-}$  aerosol system similar to the fine particle pH predicted by a thermodynamic modeling used in this study (Guo et al., 2015)) has led to the use of measurable aerosol properties as acidity proxies, such as aerosol ammonium sulfate ratio or ion balances (e.g. (Paulot and Jacob, 2014; Wang et al., 2016; Silvern et al., 2017)). Recent work has shown that acidity proxies are not uniquely related to pH, which in turn strongly questions any conclusions derived from its use. There are numerous reasons why acidity proxies do not represent pH well; they do not capture the variability in particle water content, ion activity coefficients, or partial dissociation of species in the aerosol phase (Guo et al., 2015; Hennigan et al., 2015; Guo et al., 2016).” o There are a number of problems with this section that need to be addressed. o It is not fair to state that the use of the sulfate/bisulfate ratio in Rindelaub et al. led to the use of molar ratios or ion balances, since those have been used for decades and Rindelaub came out in 2016 (Rindelaub et al., 2016). o Secondly, the use of the bisulfate - to - sulfate ratio to determine pH is not indirect and is in fact more direct than thermodynamic modeling of gas particle partitioning, as both species are in the aerosol phase where pH is being determined and the effects of coatings or other nonideal behavior is avoided. The method does use a thermodynamic model to determine activity coefficients, but the fact this is combined with multiple concentrations directly measured in the aerosol phase makes it very different than ion balance or molar ratio methods. o The manuscript states that Rindelaub only used particles above 10 microns, but*

*fails to mention Craig et al. from this summer, which showed this direct method working down to 2 - 3 microns for a range of systems (Craig et al., 2017)."*

We have edited the sentence citing Rindelaub et al. (2016) to minimize any confusion.

We clearly have a different understanding of "direct" pH measurement than the reviewer. We cited the method of Rindelaub et al. (2016) as an indirect (but clearly particle-level) measurement of aerosol pH because it doesn't quantify the hydronium ion aqueous phase activity directly. Instead, it infers the  $H^+$  concentration by  $HSO_4^-/SO_4^{2-}$  ratio, equilibrium constant, and activity coefficients. Deliquesced ambient fine particles are very concentrated liquids. The average ionic strength was  $29 \text{ mol L}^{-1}$  for this study. Therefore, non-ideality cannot be ignored and avoided by the method of Rindelaub et al. (2016) as the reviewer claims. Furthermore, the activity coefficients of  $HSO_4^-$  and  $SO_4^{2-}$  cannot be determined simply by  $HSO_4^-$  and  $SO_4^{2-}$  concentrations because the non-ideal effects are caused by interactions of all water-soluble ions in aqueous aerosols, such as  $NH_4^+$  and  $NO_3^-$ . In terms of determining activity coefficients, a thermodynamic model with an input of all measured inorganic ions should be more accurate than one with only a fraction of the ions input.

We thank the reviewer from bringing attention on Craig et al. (2017) and this paper will be cited in future work.

10. *"Page 2, 2nd Paragraph: The authors go to great lengths to make clear that organic coatings or glassy particles which inhibit equilibrium between gases and particles are not possible based on "established literature", but most of that literature is from the groups who authored this manuscript. If there are limitations to the thermodynamic model approach used in those studies, citing their prior work does not invalidate the other work suggesting films might be important, such as Havalala Pye's modeling paper from earlier this year."*

We agree that we mainly cite our past work, because there are very few other detailed assessments of pH predictions by thermodynamic models using in-situ observations. What is meant by "established literature" is that assumption of equilibrium between gas and particle phases is widely used and agrees with observations. Take water vapor for example; LWC is predicted based on the equilibrium assumption and there is a rich body of published literature (spanning decades) comparing predicted and measured LWC. As noted in the paper, given their similar molecular weights and particle uptake properties, it is hard to argue that  $NH_3$  and  $H_2O$  could interact completely differently with a hypothesized organic film so that equilibrium is not established for one species but established for another. (This is all articulated in the 2<sup>nd</sup> paragraph of the Introduction).

As for our reported results, we have always tested the thermodynamic predictions in our past studies. We use gas-particle partitioning of semivolatile species that are sensitive to pH, to predict particle pH and compare predicted vs.

measured partitioning, based on the equilibrium assumption, to evaluate pH accuracy. At least in our past analysis, these comparisons show that results based on the equilibrium assumption agree with observations, when RH is sufficiently high (e.g. > 40% or higher) and particles are completely deliquesced. We have cited more papers from other groups (Ansari and Pandis, 2000; Moya et al., 2001; Morino et al., 2006; Liu et al., 2017; Paulot et al., 2017), to strengthen our point, but it nevertheless remains the same.

Pye et al. (2017) is still in review, therefore we do not address the issues raised in that paper. Nevertheless it is important to note it is an equilibrium model study, so kinetic limitations from hypothetical organic films are not important in that study as well.

11. “Page 3 Line 26: The authors state that “14% of “sulfate” is predicted to be  $\text{HSO}_4^-$  and the rest as  $\text{SO}_4^{2-}$  in the winter dataset.” Based on a simple acid dissociation constant calculation at  $\text{pH}=1$ , bisulfate should be >80% of the combination of sulfate and bisulfate. Some explanation should be included to explain why this does not follow basic acid dissociation rules. Is it related to activity coefficients somehow? This need to be addressed in a revised manuscript. Also it is confusing to refer to sulfate, bisulfate, and sulfuric acid together as “total sulfate”, as they are each distinct species. Total S(VI) sulfur could work or some other nomenclature.”

The simple calculation as referred by the reviewer is likely based on ideal solutions, where all activity coefficients are treated as one. In this case,  $\text{HSO}_4^-$  is the dominant form at pH of 1 (shown as dash lines in Figure II). After taking into account of the activity coefficients predicted by ISORROPIA, the curves move left by 2 units (comparing solid vs. dash lines in Figure b). As a result,  $\text{SO}_4^{2-}$  is the dominant form at pH of 1. Therefore, our statement is consistent with the basic acid dissociation rules. Instead of citing 14% as  $\text{HSO}_4^-$  from WINTER study, the Figure II has been added to supplemental material to explain how activity coefficients affect the relative fractions of  $\text{SO}_4^{2-}$  and  $\text{HSO}_4^-$ .

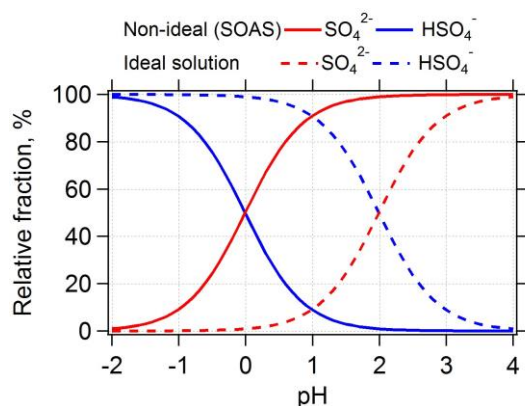

Figure II. Relative fractions of  $\text{SO}_4^{2-}$  (red) and  $\text{HSO}_4^-$  (blue) calculated based on ideal solutions (all activity coefficients equal one) and the SOAS non-ideal conditions. The average activity coefficients of  $\gamma_{\text{SO}_4^{2-}}/\gamma_{\text{HSO}_4^-} = 0.01$  are predicted by ISORROPIA for the SOAS fine particles.  $\gamma_{\text{H}^+} = 1$  is assumed; a smaller  $\gamma_{\text{H}^+}$  shifts the red and blue curves towards the left, increasing  $\text{SO}_4^{2-}$  relative fraction at a given pH. The dissociation constant of  $\text{HSO}_4^-$  is  $1.015 \times 10^{-2} \text{ mol kg}^{-1}$  at 298.15 K (Fountoukis and Nenes, 2007).

12. *“Page 2 Line 9: I believe the word “and” is missing after (Guo et al., 2015)). Also the second parenthesis is not needed.”*

This has been edited.

13. *“Page 3 Line 13: “or if there is free  $\text{H}_2\text{SO}_4$  in the aerosol”. For the pH values in this manuscript and others using this method, the aerosol acidity is never sufficient for any  $\text{H}_2\text{SO}_4$  to exist. Below pH = 2, sulfate will transition to bisulfate, but not sulfuric acid.”*

We agree that at on average pH  $\sim 1$  in this study, free from of  $\text{H}_2\text{SO}_4$  doesn't exist. The sentence in the text aims to explain the theoretical possibilities causing  $R = 0$ . For example,  $\text{NH}_4\text{HSO}_4$  cannot give  $R = 0$ . We have revised the sentence to “the lower limit is 0 for  $R$  when  $\text{SO}_4^{2-}$  is associated with other cations instead of  $\text{NH}_4^+$  (e.g.  $\text{Na}_2\text{SO}_4$ ) or if there is free  $\text{H}_2\text{SO}_4$  in the aerosol (in theory but not the reason at pH  $\sim 1$  in this study)”. Below pH of 2, sulfate transforms to bisulfate; but below pH of -2, bisulfate transforms to sulfuric acid.

14. *“Page 3 Line 14: missing the word “are”, should be “, but are rare for”.”*

We have revised accordingly.

15. *“Page 5 Line 39: “mode  $R$  with measure  $\text{Na}^+$  input”, should be “measured”.”*

We have revised accordingly.

16. *“A constant throughout the manuscript is that strong statements are supported primarily by prior work from the authors of this study. It would strengthen the manuscript to either make less strong statements or cite work from other groups to support the claims being made.”*

This point is well taken. We have cited more work from other groups. We believe that our statements are justified by our analysis.





## References:

- Allen, H. M., Draper, D. C., Ayres, B. R., Ault, A., Bondy, A., Takahama, S., Modini, R. L., Baumann, K., Edgerton, E., Knote, C., Laskin, A., Wang, B., and Fry, J. L.: Influence of crustal dust and sea spray supermicron particle concentrations and acidity on inorganic  $\text{NO}_3^-$  aerosol during the 2013 Southern Oxidant and Aerosol Study, *Atmospheric Chemistry and Physics*, 15, 10669-10685, doi: 10.5194/acp-15-10669-2015, 2015.
- Ansari, A. S., and Pandis, S. N.: The effect of metastable equilibrium states on the partitioning of nitrate between the gas and aerosol phases, *Atmospheric Environment*, 34, 157-168, doi: 10.1016/s1352-2310(99)00242-3, 2000.
- Craig, R. L., Nandy, L., Axson, J. L., Dutcher, C. S., and Ault, A. P.: Spectroscopic Determination of Aerosol pH from Acid-Base Equilibria in Inorganic, Organic, and Mixed Systems, *J Phys Chem A*, 121, 5690-5699, doi: 10.1021/acs.jpca.7b05261, 2017.
- DOE: Handbook of Methods for the Analysis of the Various Parameters of the Carbon Dioxide System in Sea Water. Version 2, edited by: Dickson, A. G., and Goyet, C., ORNL/CDIAC-74, 1994.
- Fountoukis, C., and Nenes, A.: ISORROPIA II: a computationally efficient thermodynamic equilibrium model for  $\text{K}^+$ - $\text{Ca}^{2+}$ - $\text{Mg}^{2+}$ - $\text{NH}_4^+$ - $\text{Na}^+$ - $\text{SO}_4^{2-}$ - $\text{NO}_3^-$ - $\text{Cl}^-$ - $\text{H}_2\text{O}$  aerosols, *Atmospheric Chemistry and Physics*, 7, 4639-4659, doi: 10.5194/acp-7-4639-2007, 2007.
- Guo, H., Xu, L., Bougiatioti, A., Cerully, K. M., Capps, S. L., Hite, J. R., Carlton, A. G., Lee, S. H., Bergin, M. H., Ng, N. L., Nenes, A., and Weber, R. J.: Fine-particle water and pH in the southeastern United States, *Atmospheric Chemistry and Physics*, 15, 5211-5228, doi: 10.5194/acp-15-5211-2015, 2015.
- Guo, H., Liu, J., Froyd, K. D., Roberts, J. M., Veres, P. R., Hayes, P. L., Jimenez, J. L., Nenes, A., and Weber, R. J.: Fine particle pH and gas-particle phase partitioning of inorganic species in Pasadena, California, during the 2010 CalNex campaign, *Atmospheric Chemistry and Physics*, 17, 5703-5719, doi: 10.5194/acp-17-5703-2017, 2017.
- Liu, M., Song, Y., Zhou, T., Xu, Z., Yan, C., Zheng, M., Wu, Z., Hu, M., Wu, Y., and Zhu, T.: Fine particle pH during severe haze episodes in northern China, *Geophysical Research Letters*, 44, 5213-5221, doi: 10.1002/2017gl073210, 2017.
- Morino, Y., Kondo, Y., Takegawa, N., Miyazaki, Y., Kita, K., Komazaki, Y., Fukuda, M., Miyakawa, T., Moteki, N., and Worsnop, D. R.: Partitioning of  $\text{HNO}_3$  and particulate nitrate over Tokyo: Effect of vertical mixing, *Journal of Geophysical Research*, 111, doi: 10.1029/2005jd006887, 2006.
- Moya, M., Ansari, A. S., and Pandis, S. N.: Partitioning of nitrate and ammonium between the gas and particulate phases during the 1997 IMADA-AVER study in Mexico City, *Atmospheric Environment*, 35, 1791-1804, doi: 10.1016/s1352-2310(00)00292-2, 2001.
- Paulot, F., Paynter, D., Ginoux, P., Naik, V., Whitburn, S., Van Damme, M., Clarisse, L., Coheur, P. F., and Horowitz, L. W.: Gas-aerosol partitioning of ammonia in biomass burning plumes: Implications for the interpretation of spaceborne observations of ammonia and the radiative forcing of ammonium nitrate, *Geophysical Research Letters*, doi: 10.1002/2017gl074215, 2017.
- Pye, H. O. T., Zuend, A., Fry, J. L., Isaacman-VanWertz, G., Capps, S. L., Appel, K. W., Foroutan, H., Xu, L., Ng, N. L., and Goldstein, A. H.: Coupling of organic and inorganic aerosol systems and the effect on gas-particle partitioning in the southeastern United States, *Atmospheric Chemistry and Physics Discussions*, 1-25, doi: 10.5194/acp-2017-623, 2017.
- Rindelaub, J. D., Craig, R. L., Nandy, L., Bondy, A. L., Dutcher, C. S., Shepson, P. B., and Ault, A. P.: Direct Measurement of pH in Individual Particles via Raman Microspectroscopy and Variation in Acidity with Relative Humidity, *J Phys Chem A*, 120, 911-917, doi: 10.1021/acs.jpca.5b12699, 2016.
